# Supplementary material for: SIX3, a tumor suppressor, inhibits astrocytoma tumorigenesis by transcriptional repression of AURKA/B
Source: J Hematol Oncol. 2017 Jun 8;10:115. doi: 10.1186/s13045-017-0483-2 (PMC5465582; doi:10.1186/s13045-017-0483-2)
Supplement: Supplementary file 2 — Sequences of primers for RT-qPCR and ChIP-PCR. (XLSX 12 kb) [file 13045_2017_483_MOESM2_ESM.xlsx]

## Sheet: Sheet1
AURKA RT-qPCR	Forward: CACCCCTGGATCACAGCAAA
	Reverse: GCCCTGGCTCAAGGATTTCT
AURKB RT-qPCR	Forward: CTAAAGTTCCCCGCTTCCGT
	Reverse: CATACAAACACACGCACCCG
p53 RT-qPCR	Forward: CAGACCAGCCGAAGTCAGCAAT
	Reverse: CAGTGCTCGCTTAGTGCTCCCT
GAPDH RT-qPCR	Forward: AACGGATTTGGTCGTATTGGG
	Reverse: CGCTCCTGGAAGATGGTGAT
SIX3 RT-qPCR	Forward: TCAACAAACACGAGTCGATCC
	Reverse: TTCTCGGCCTCCTGGTAGTG
AURKA promoter 1	Forward: ATCCCAGAATCTTCCATTACTT
	Reverse: AACAAGCTCAGTTGCCTTAA
AURKA promoter 2	Forward: AAAACAGTAATAATCGGGAAGG
	Reverse: TTTGAATAAGCCAGAAACCA
AURKA promoter 3	Forward: CTATTCTCCTGTCTCAGCCTCC
	Reverse: CCCGTAATCCCAGCACTTT
AURKA promoter 4	Forward: AAATGGGTTCAAGGAGGTCA
	Reverse: GGAGTTGGCAATTCTGGTGT
AURKA promoter 5	Forward: TCCTTACCTGCCTAAAGTCTGA
	Reverse: ACGGAGGAAATGTATGGTGAAT
AURKA promoter 6	Forward: AGGATGCCATGTAGGCTTTA
	Reverse: GCCAGACTACCCACTTGTGA
AURKA promoter 7	Forward: CCCCTACACCACTGTTCTATCC
	Reverse: TTCTGTGGGAGTTGAGAAGTTAG
AURKA promoter 8	Forward: CACGAGGACAAGAACCCG
	Reverse: CGCTTCCATTCCCACCC
AURKB promoter 1	Forward: CCATACCTTGCCCTATACATC
	GTGGGAATCAGTTTCTTGCT
AURKB promoter 2	Forward: TGCCTGATCCAATAACCATAA
	Reverse: CACTGCGCCCAGCTTTA
AURKB promoter 3	Forward: AATAAAGCTGGGCGCAGTG
	Reverse: AGGCTGGCCTCAGGTGAT
AURKB promoter 4	Forward: GAGGAGGAGGTTGTGGTGAG
	Reverse: TCCAGTCTATGCAGTCGGTTT
AURKB promoter 5	Forward: CAGTAATGAAATCTGAGGGTTAG
	Reverse: TCTGTTAGCTGCCGTGTTGT
AURKB promoter 6	Forward: AGCAAACAACGGAATACAAAGT
	GCGCCAGTTATGTCAACACC
AURKB promoter 7	Forward: TAACTGGCGCTCCATCGG
	Reverse: GCCTCGGCTTCCCAAA
AURKB promoter 8	Forward: AATTAGCCAGGCGTGGTG
	Reverse: AGGCTGGAGTATAATGGTGCT
P1	Forward: ATCCAATCTGAAGCCCACCCA
	Reverse: CGGAGCGTCAAGTCCCCTGT
P2	Forward: GTAAGATGGCGAGAAAAGCAAGA
	Reverse: TCTCCCCGTGTCCCAGTACC
P3	Forward: CCGCCCGCAAACAACTGAATC
	Reverse: ACTGGAAGCCAAGCGTGAGCC
